# Supplementary material for: Vacancy engineering of a solution processed CuI semiconductor: tuning the electrical properties of inorganic P-channel thin-film transistors
Source: Royal Society of Chemistry journal article supplement (doi:10.1039/d0tc02005b), 2020-01-01
Supplement: d0tc02005b1.pdf [file d0tc02005b1.pdf]

**Supplementary Materials for**  
**Vacancy Engineering of Solution Processes CuI Semiconductor: Tuning the Electrical**  
**Properties of Inorganic P-Channel Thin Film Transistors**

Seonjeong Lee<sup>a</sup>, Han Ju Lee<sup>a</sup>, Yena Ji<sup>a</sup>, Sung Mook Choi<sup>b</sup>, Keun Hyung Lee<sup>c,\*</sup>, and Kihyon Hong<sup>a,\*</sup>

<sup>a</sup>Department of Materials Science and Engineering, Chungnam National University (CNU),  
Daejeon 34134, Republic of Korea

<sup>b</sup>Materials Center for Energy Convergence, Korea Institute of Materials Science,  
Changwon 51508, Republic of Korea

<sup>c</sup>Department of Chemistry and Chemical Engineering, Inha University, Incheon 22212,  
Republic of Korea

Email: [kh.lee@inha.ac.kr](mailto:kh.lee@inha.ac.kr) (K. H. Lee), [khong@cnu.ac.kr](mailto:khong@cnu.ac.kr) (K. Hong)

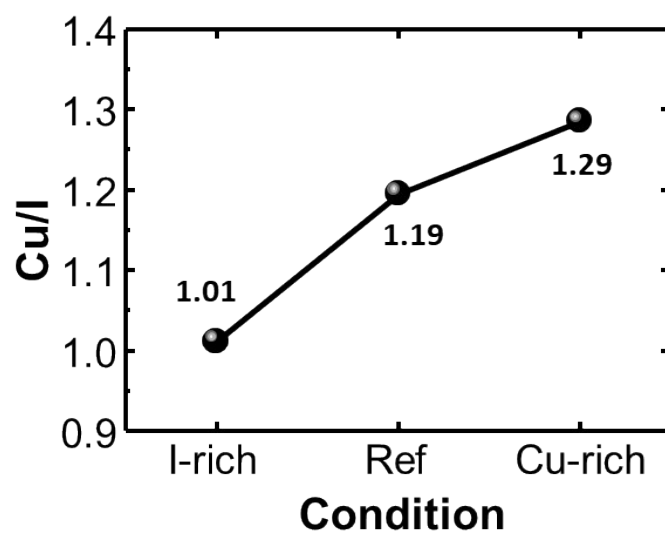

**Figure S1.** Changes of compositional Cu/I ratio for CuI samples. The ratio was calculated from the XPS Cu and I core level peaks.

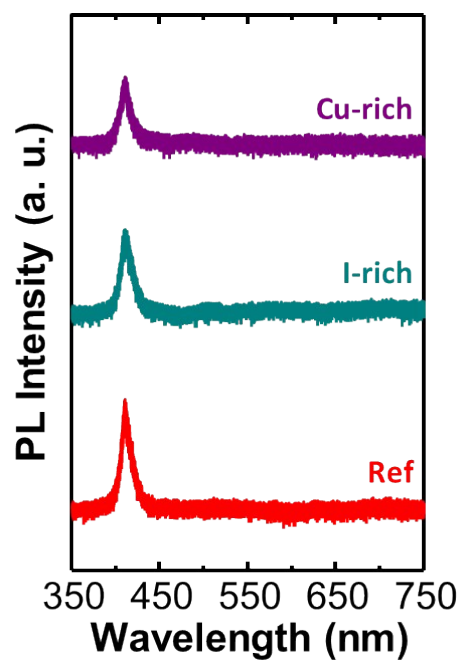

**Figure S2.** Full range PL spectra of CuI samples.

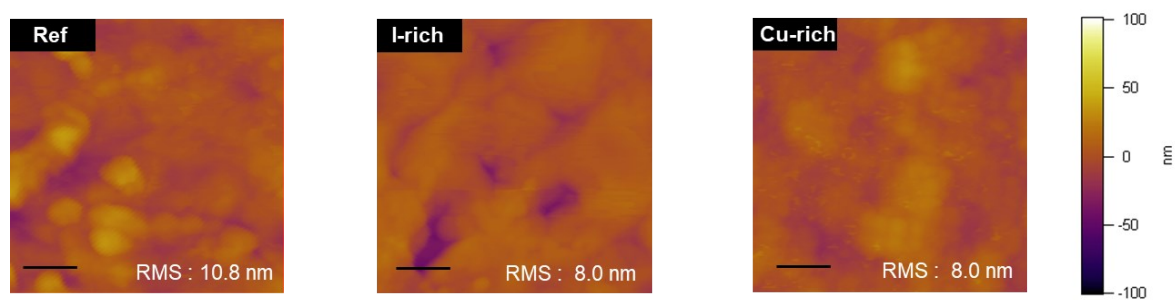

**Figure S3.** AFM height images of CuI samples. The scan area is 1  $\mu\text{m} \times 1 \mu\text{m}$ . Scale bar: 200 nm.

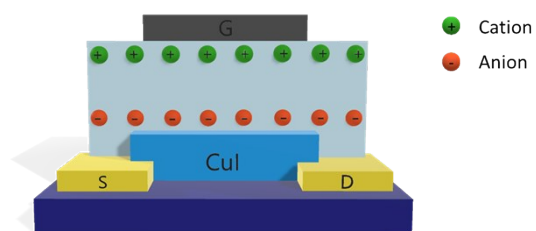

**Figure S4.** Device structure of electrolyte gated transistors. Aligned cations and anions suggest the formation of high capacitance electric double layer.

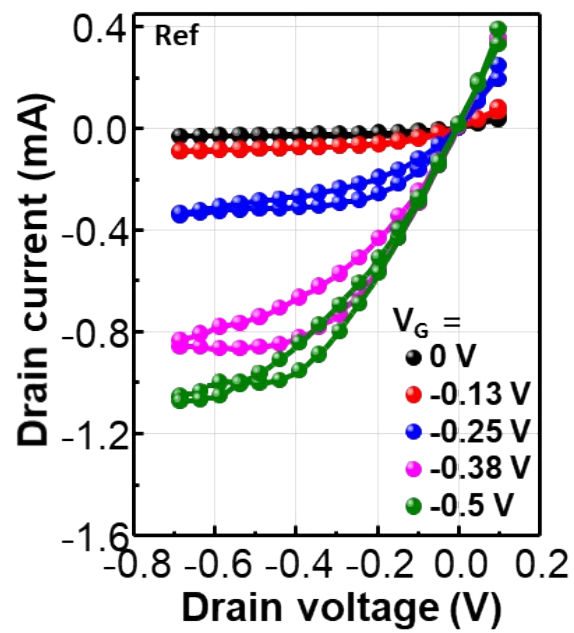

**Figure S5.**  $I_D$ - $V_D$  curves for CuI-TFTs (Ref-CuI).

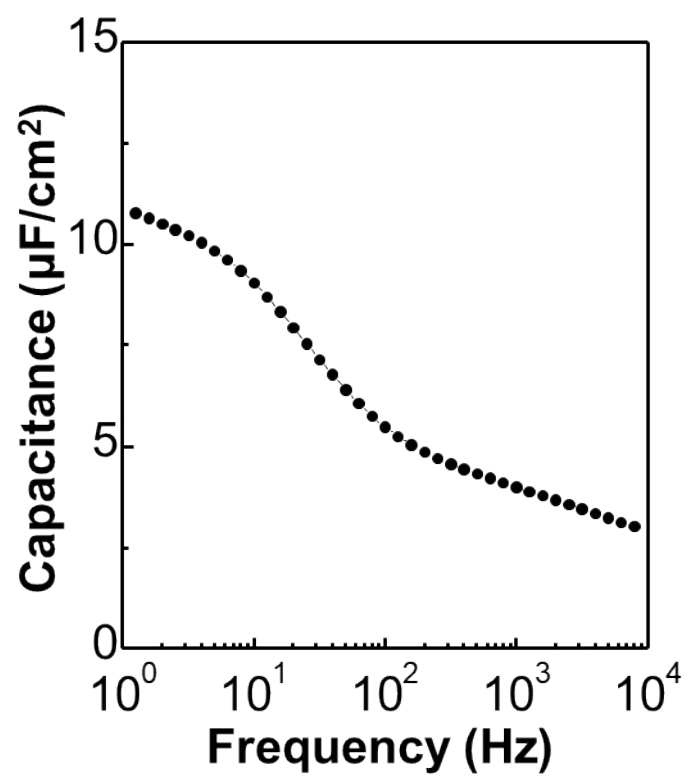

**Figure S6**, Frequency-capacitance plot of Au/electrolyte/Au.

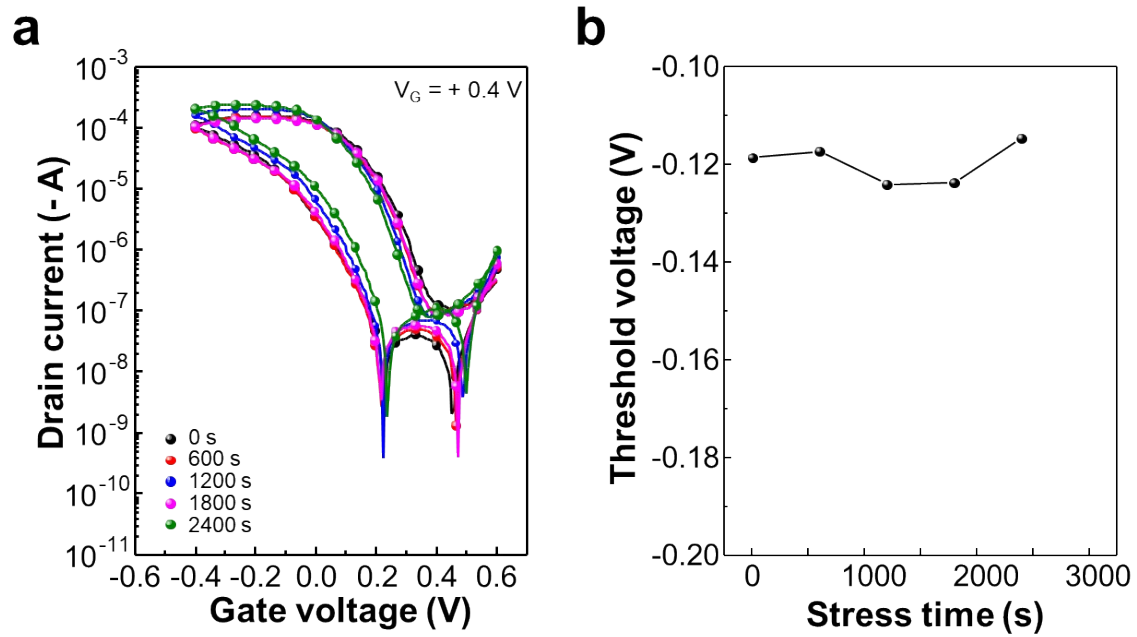

**Figure S7.** (a) Transfer curves for positive bias stress measurement (Ref-TFTs). (b) Changes of  $V_{th}$  during the PBS test.
